# Supplementary material
Source: PubMed Central journal article supplement (PMC1236581)

Tettelin *et al.* Figure 5

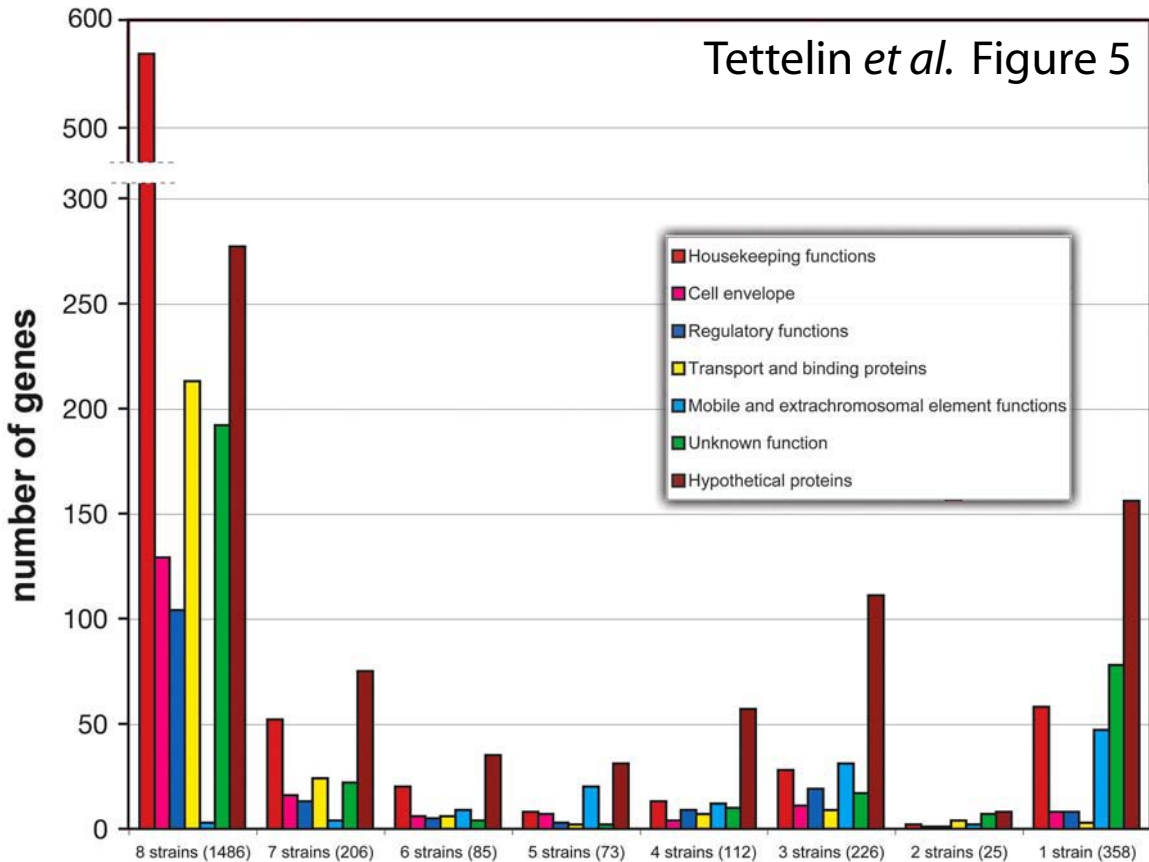

Supplement: pnas_0506758102_1.pdf [file pnas_0506758102_1.pdf]
